# Supplementary material for: The structure of chloromethyl thiocyanate, CH2ClSCN, in gas and crystalline phases
Source: Royal Society of Chemistry journal article supplement (doi:10.1039/c5cp01968k), 2015-01-01
Supplement: c5cp01968k1.pdf [file c5cp01968k1.pdf]

**Supporting information available:** It contains the molecular electron scattering intensity curves (see Figures S1–S2), the details of the GED experiments (Table S1), experimental interatomic distances, mean square amplitudes and vibrational corrections (Tables S2–S3) and experimental Cartesian coordinates of *gauche* and *anti* conformers in the gas-phase (Tables S4–S5).

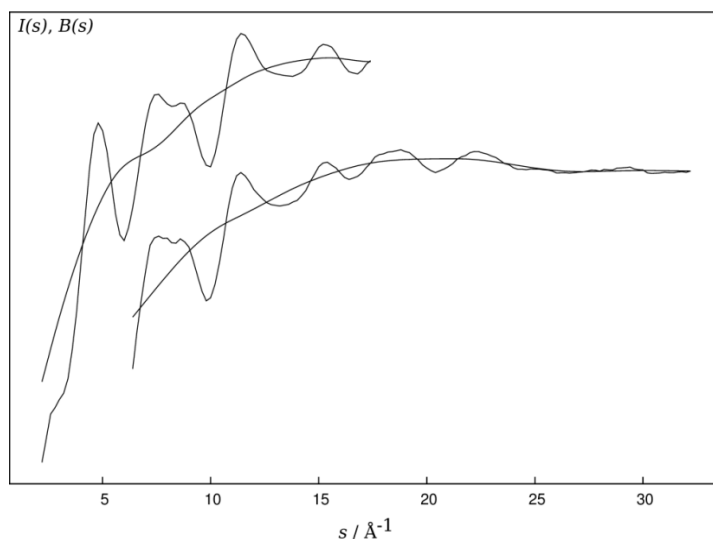

Figure S1. Total intensity curves and additive background lines of  $\text{CH}_2\text{CISCN}$  for short and long nozzle-to-plate distances

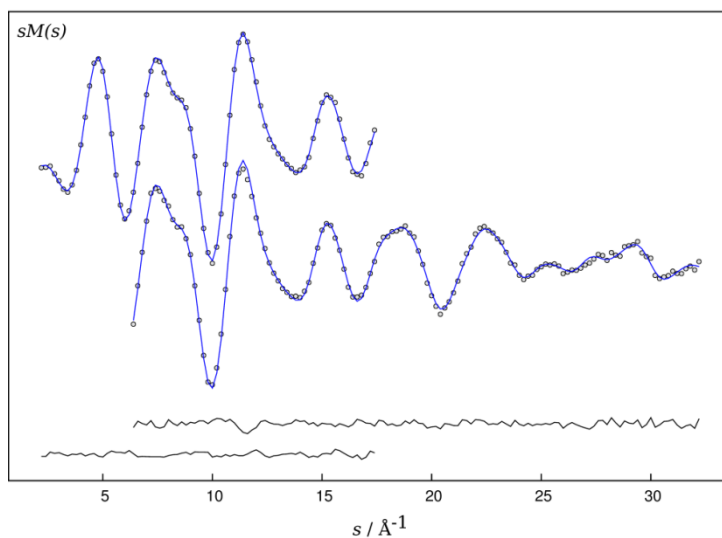

Figure S2. Experimental (circles) and model (lines) molecular intensity curves of  $\text{CH}_2\text{CISCN}$  for short and long nozzle-to-plate distances. Difference curves are shown at the bottom

Table S1. Details of the GED experiments

| Parameters | $\text{CH}_2\text{CISCN}$ |
|------------|---------------------------|
|            |                           |

|                                                    |                      |                      |
|----------------------------------------------------|----------------------|----------------------|
| Camera setting                                     | Short                | Long                 |
| Nozzle-to-plate distance, mm                       | 250.0                | 500.0                |
| Accelerating voltage, kV                           | 60                   | 60                   |
| Fast electrons current, <sup>a</sup> $\mu\text{A}$ | 0.16                 | 0.07                 |
| Electron wavelength, <sup>ab</sup> $\text{\AA}$    | 0.048478             | 0.048423             |
| Nozzle temperature, <sup>a</sup> K                 | 338                  | 336                  |
| Sample gas pressure, <sup>ac</sup> mbar            | $3.7 \times 10^{-6}$ | $1.9 \times 10^{-5}$ |
| Residual gas pressure, <sup>a</sup> mbar           | $2.0 \times 10^{-7}$ | $6.6 \times 10^{-7}$ |
| Exposure time, <sup>a</sup> s                      | 38                   | 24                   |
| Used $s$ range, $\text{\AA}^{-1}$                  | 6.4 – 32.2           | 2.2 – 17.4           |
| Number of inflection points <sup>d</sup>           | 5                    | 3                    |

<sup>a</sup> Average value for the parameter is given.

<sup>b</sup> Determined from  $\text{C}_6\text{H}_6$  diffraction patterns measured in the same experiment.

<sup>c</sup> During of the measurement.

<sup>d</sup> Number of inflection points on the background line.

Table S2. Experimental interatomic distances, mean square amplitudes and vibrational corrections to equilibrium geometry of  $\text{CH}_2\text{ClSCN}$ , *gauche* conformer<sup>a</sup>

| Atom 1 | Atom 2 | $r_a$     | $l_{\text{exp}}$ | corr      | group |
|--------|--------|-----------|------------------|-----------|-------|
| C1     | H6     | 1.096.296 | 0.067979         | -0.015600 | 1     |
| C1     | H7     | 1.098.385 | 0.068159         | -0.015700 | 1     |
| C3     | N4     | 1.162.652 | 0.030532         | -0.003900 | 1     |
| S2     | C3     | 1.697.356 | 0.040859         | -0.006000 | 1     |
| C1     | Cl5    | 1.775.171 | 0.048672         | -0.008800 | 1     |
| C1     | S2     | 1.817.056 | 0.050378         | -0.012400 | 1     |
| H6     | H7     | 1.855.168 | 0.109916         | -0.019300 | 1     |
| S2     | H7     | 2.337.487 | 0.118951         | -0.018300 | 2     |
| Cl5    | H6     | 2.344.189 | 0.111619         | -0.014500 | 2     |
| Cl5    | H7     | 2.345.230 | 0.112136         | -0.012100 | 2     |
| S2     | H6     | 2.395.715 | 0.113272         | -0.016800 | 2     |

|    |     |           |          |           |   |
|----|-----|-----------|----------|-----------|---|
| C1 | C3  | 2.694.463 | 0.087779 | -0.019100 | 3 |
| C3 | H6  | 2.731.040 | 0.200981 | -0.002500 | 3 |
| S2 | N4  | 2.849.254 | 0.046816 | 0.000500  | 3 |
| S2 | Cl5 | 2.998.341 | 0.073581 | -0.011700 | 3 |
| C3 | Cl5 | 3.442.991 | 0.185908 | -0.045700 | 4 |
| N4 | H6  | 3.480.808 | 0.246658 | 0.001600  | 4 |
| C3 | H7  | 3.595.665 | 0.095738 | -0.004800 | 4 |
| C1 | N4  | 3.672.924 | 0.125240 | -0.031300 | 4 |
| N4 | Cl5 | 4.203.304 | 0.228758 | -0.099500 | 5 |
| N4 | H7  | 4.634.751 | 0.105863 | -0.000300 | 5 |

<sup>a</sup> All values are in Å; corrections were calculated using SHRINK program from B3LYP/6-31G(d) harmonic and cubic force fields. The amplitudes were refined in groups by multiplying on scale factors (one per group), which were treated as independent parameters. Threefold standard deviations for the scale factors in groups 1 – 5 were 0.060, 0.141, 0.056, 0.194 and 0.138, respectively

Table S3. Experimental interatomic distances, mean square amplitudes and vibrational corrections to equilibrium geometry of CH<sub>2</sub>ClSCN, *anti* conformer<sup>a</sup>

| Atom 1 | Atom 2 | $r_a$     | $l_{exp}$ | corr      | group |
|--------|--------|-----------|-----------|-----------|-------|
| C1     | H6     | 1.096.262 | 0.068069  | -0.015600 | 1     |
| C1     | H7     | 1.096.262 | 0.068069  | -0.015600 | 1     |
| C3     | N4     | 1.163.274 | 0.030532  | -0.003900 | 1     |
| S2     | C3     | 1.697.267 | 0.040949  | -0.005500 | 1     |
| C1     | Cl5    | 1.771.962 | 0.046696  | -0.010300 | 1     |
| C1     | S2     | 1.833.463 | 0.050378  | -0.012400 | 1     |
| H6     | H7     | 1.949.208 | 0.108749  | -0.018600 | 1     |
| Cl5    | H6     | 2.345.493 | 0.111929  | -0.012700 | 2     |
| Cl5    | H7     | 2.345.493 | 0.111929  | -0.012700 | 2     |
| S2     | H6     | 2.411.968 | 0.114304  | -0.015300 | 2     |
| S2     | H7     | 2.411.968 | 0.114304  | -0.015300 | 2     |
| S2     | Cl5    | 2.592.109 | 0.090762  | -0.026600 | 2     |
| C1     | C3     | 2.646.957 | 0.101397  | -0.024900 | 2     |
| S2     | N4     | 2.849.128 | 0.046624  | 0.002000  | 3     |
| C3     | H6     | 2.899.589 | 0.261707  | -0.020600 | 3     |
| C3     | H7     | 2.899.589 | 0.261707  | -0.020600 | 3     |
| C1     | N4     | 3.688.437 | 0.154078  | -0.132400 | 4     |
| N4     | H6     | 3.807.180 | 0.327437  | -0.150800 | 4     |
| N4     | H7     | 3.807.180 | 0.327437  | -0.150800 | 4     |
| C3     | Cl5    | 3.992.775 | 0.075793  | 0.017000  | 4     |
| N4     | Cl5    | 5.136.801 | 0.034062  | -0.046100 | 5     |

<sup>a</sup> All values are in Å; corrections were calculated using SHRINK program from B3LYP/6-31G(d) harmonic and cubic force fields. For the definition of groups and further information see caption of Table S1.

Table S4. Experimental (GED) Cartesian coordinates of CH<sub>2</sub>CISCN, *gauche* conformer (Å)

| <i>N</i> | At | An | Mass        | <i>x</i>        | <i>y</i>        | <i>z</i>        |
|----------|----|----|-------------|-----------------|-----------------|-----------------|
| 1        | C  | 6  | 12.00000000 | 0.000000000000  | 0.000000000000  | 0.000000000000  |
| 2        | S  | 16 | 31.97207069 | 1.804655914025  | 0.000000000000  | 0.000000000000  |
| 3        | C  | 6  | 12.00000000 | 2.092826950835  | 1.666625671047  | 0.000000000000  |
| 4        | N  | 7  | 14.00307401 | 2.326514202099  | 2.801560048665  | 0.004581959091  |
| 5        | Cl | 17 | 34.96885271 | -0.704614597813 | 0.505607826393  | -1.538813374705 |
| 6        | H  | 1  | 1.00782503  | -0.342045638194 | 0.693685100616  | 0.754791342652  |
| 7        | H  | 1  | 1.00782503  | -0.263107500140 | -1.039002890897 | 0.153151135900  |

Table S5. Experimental (GED) Cartesian coordinates of CH<sub>2</sub>CISCN, *anti* conformer (Å)

| <i>N</i> | At | An | Mass        | <i>x</i>        | <i>y</i>        | <i>z</i>        |
|----------|----|----|-------------|-----------------|-----------------|-----------------|
| 1        | C  | 6  | 12.00000000 | 0.000000000000  | 0.000000000000  | 0.000000000000  |
| 2        | S  | 16 | 31.97207069 | 1.821062774766  | 0.000000000000  | 0.000000000000  |
| 3        | C  | 6  | 12.00000000 | 2.012390652900  | 1.680913209013  | 0.000000000000  |
| 4        | N  | 7  | 14.00307401 | 2.150594692295  | 2.832020202101  | 0.000000000000  |
| 5        | Cl | 17 | 34.96885271 | -0.044510049626 | -1.761099929462 | -0.000000000000 |
| 6        | H  | 1  | 1.00782503  | -0.345929472216 | 0.341102815863  | -0.965304122360 |
| 7        | H  | 1  | 1.00782503  | -0.345929472216 | 0.341102815863  | 0.965304122360  |
